# Supplementary material for: An insight into the protospacer adjacent motif of Streptococcus pyogenes Cas9 with artificially stimulated RNA-guided-Cas9 DNA cleavage flexibility
Source: Royal Society of Chemistry journal article supplement (doi:10.1039/c6ra02774a), 2016-01-01
Supplement: c6ra02774a1.pdf [file c6ra02774a1.pdf]

*Supplementary Information*

**An insight into the protospacer adjacent motif of  
*Streptococcus pyogenes* Cas9 with artificially stimulated  
RNA-guided-Cas9 DNA cleavage flexibility**

**Yujie Geng<sup>a</sup>, Zixin Deng<sup>a</sup>, Yuhui Sun<sup>\*a</sup>**

<sup>a</sup> Key Laboratory of Combinatorial Biosynthesis and Drug Discovery (Wuhan University), Ministry of Education, and Wuhan University School of Pharmaceutical Sciences, Wuhan 430071, People's Republic of China

\* Correspondence and requests for materials should be addressed to E-mail:

yhsun@whu.edu.cn

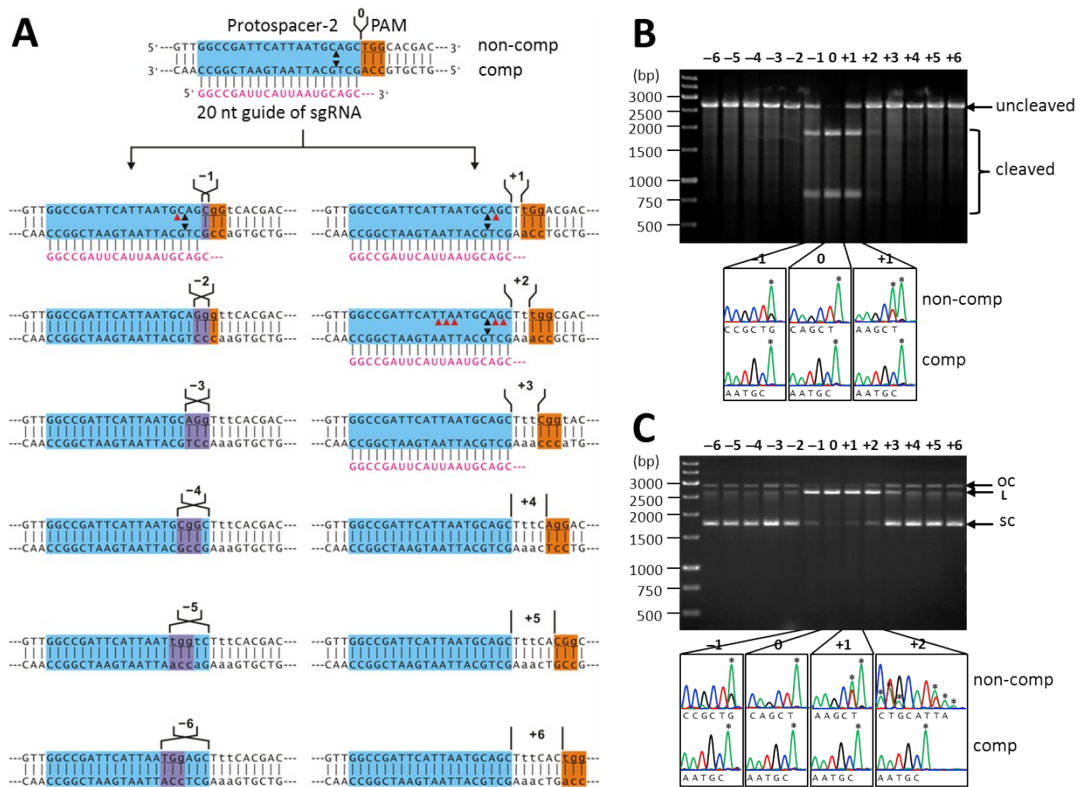

**Fig. S1. Impact of length of the interspace between protospacer-2 and NGG on SpCas9 cleavage.** (A) Schematic representation of dsDNA with interspace of variable length. Protospacer region, NGG (underlined) region and the overlapping region of NGG and protospacer are highlighted in blue, orange and purple, respectively, and sgRNA guide sequence is coloured red. The black and red triangles indicate known SpCas9 cleavage sites and newly observed cleavage sites in this study, respectively. The number with/without + and – indicate the number of base pairs of interspace or overlapping sequence between the protospacer and NGG, respectively. (B) and (C) show the cleavage results associated with dsDNA shown in (A) and end-sequencing analysis of cleaved products of *SspI*-linearized plasmid and circular plasmid, respectively. The 3' terminal A overhang, which is an artifact of the sequencing reaction, is represented by an asterisk. The following

abbreviations were used: OC, open circular DNA; L, linear DNA; SC, supercoiled DNA; comp, complementary strand; non-comp, non-complementary strand.

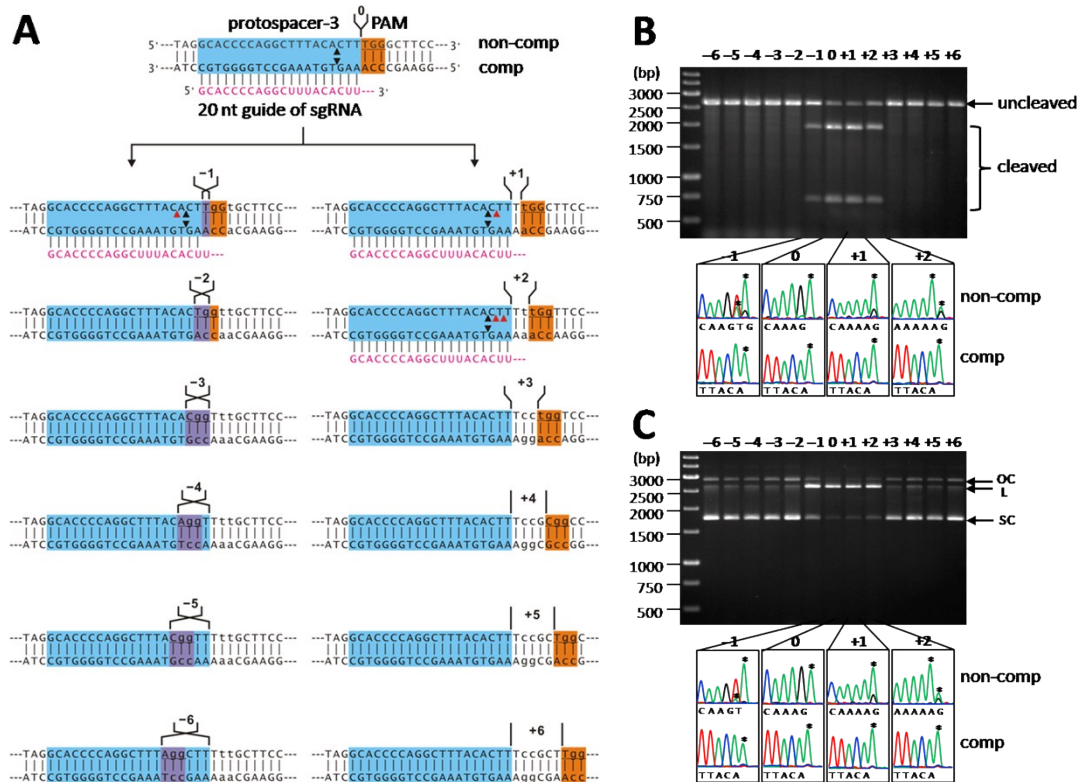

**Fig. S2. Impact of length of the interspace between protospacer-3 and NGG on SpCas9 cleavage.** (A) Schematic representation of dsDNA with interspace of variable length. The protospacer region, NGG (underlined) region and the overlapping region of NGG and protospacer are highlighted in blue, orange and purple, respectively, and sgRNA guide sequence is coloured red. The black and red indicate known cleavage sites of SpCas9 and cleavage sites that were observed for the first time as part of this study, respectively. The number with/without + and – indicate the number of base pairs associated with interspace or overlapping sequence between the

protospacer and NGG, respectively. (B) and (C) represent the cleavage results from the dsDNA shown in (A) and end-sequencing analysis of the cleavage products of *SspI*-linearized plasmid and circular plasmid, respectively. The 3' terminal A overhang which is an artifact of the sequencing reaction is represented by an asterisk. The following abbreviations were used: OC, open circular DNA; L, linear DNA; SC, supercoiled DNA; comp, complementary strand; non-comp, non-complementary strand.

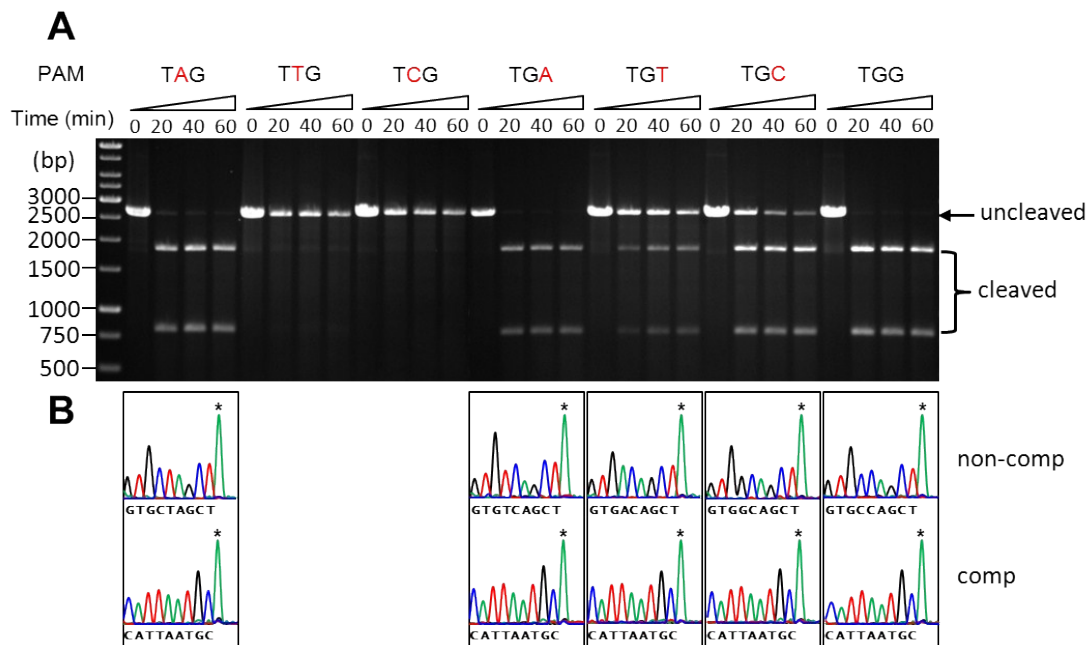

**Fig. S3. The influence of single guanosine mutations in the NGG sequence of PAM on SpCas9-mediated cleavage using *SspI*-linearized plasmid on protospacer-2. Cleavage results (A) and end-sequencing results of cleavage products generated by treatment with SpCas9 for 60 min (B).**

**Table S1. Oligonucleotides used in this study**

| Oligonucleotides (5'→3') used for <i>in vitro</i> transcription templates |         |                                                             |
|---------------------------------------------------------------------------|---------|-------------------------------------------------------------|
| protospacer-1                                                             | N1P1    | GGAATTGTGAGCGGAGAAGAGTTTTAGAGCTAGAAATAGC                    |
|                                                                           | N1P3    | GATCACTAATACGACTCACTATAGGAATTGTGAGCGGAGAAG<br>A             |
|                                                                           | N1-2P1  | GGAATTGTGAGCGGAGAAAGTTTTAGAGCTAGAAATAGC                     |
|                                                                           | N1-2P3  | GATCACTAATACGACTCACTATAGGAATTGTGAGCGGAGAAA<br>G             |
|                                                                           | N1-3P1  | GGAATTGTGAGCGGAGAAGGGTTTTAGAGCTAGAAATAGC                    |
|                                                                           | N1-3P3  | GATCACTAATACGACTCACTATAGGAATTGTGAGCGGAGAAG<br>G             |
| protospacer-2                                                             | N2P1    | GGCCGATTCATTAATGCAGCGTTTTAGAGCTAGAAATAGC                    |
|                                                                           | N2P3    | GATCACTAATACGACTCACTATAGGCCGATTCATTAATGCAGC                 |
|                                                                           | N2-2P1  | GGCCGATTCATTAATGCAGGGTTTTAGAGCTAGAAATAGC                    |
|                                                                           | N2-2P3  | GATCACTAATACGACTCACTATAGGCCGATTCATTAATGCAGG                 |
|                                                                           | N2-4P1  | GGCCGATTCATTAATGCGGCGTTTTAGAGCTAGAAATAGC                    |
|                                                                           | N2-4P3  | GATCACTAATACGACTCACTATAGGCCGATTCATTAATGCGGC                 |
|                                                                           | N2-5P1  | GGCCGATTCATTAATTGGTCGTTTTAGAGCTAGAAATAGC                    |
|                                                                           | N2-5P3  | GATCACTAATACGACTCACTATAGGCCGATTCATTAATTGGTC                 |
|                                                                           | N2-6P1  | GGCCGATTCATTAATGGAGCGTTTTAGAGCTAGAAATAGC                    |
|                                                                           | N2-6P3  | GATCACTAATACGACTCACTATAGGCCGATTCATTAATGGAGC                 |
| protospacer-3                                                             | N3P1    | GCACCCAGGCTTTACACTTGTTTTAGAGCTAGAAATAGC                     |
|                                                                           | N3P3    | GATCACTAATACGACTCACTATAGCACCCAGGCTTTACACTT                  |
|                                                                           | N3-2P1  | GCACCCAGGCTTTACACTGGTTTTAGAGCTAGAAATAGC                     |
|                                                                           | N3-2P3  | GATCACTAATACGACTCACTATAGCACCCAGGCTTTACACTG                  |
|                                                                           | N3-3P1  | GCACCCAGGCTTTACACGGTTTTAGAGCTAGAAATAGC                      |
|                                                                           | N3-3P3  | GATCACTAATACGACTCACTATAGCACCCAGGCTTTACACG<br>G              |
|                                                                           | N3-4P1  | GCACCCAGGCTTTACAGGTGTTTTAGAGCTAGAAATAGC                     |
|                                                                           | N3-4P3  | GATCACTAATACGACTCACTATAGCACCCAGGCTTTACAGG<br>T              |
|                                                                           | N3-5P1  | GCACCCAGGCTTTACGGTTGTTTTAGAGCTAGAAATAGC                     |
|                                                                           | N3-5P3  | GATCACTAATACGACTCACTATAGCACCCAGGCTTTACGGTT                  |
|                                                                           | N3-6P1  | GCACCCAGGCTTTAGGCTTGTGTTTTAGAGCTAGAAATAGC                   |
|                                                                           | N3-6P3  | GATCACTAATACGACTCACTATAGCACCCAGGCTTTAGGCTT                  |
|                                                                           | P2-4    | AGCACCGACTCGGTGCCACTTTTCCAAGTTGATAACGGACTA<br>GCCTTATTTAACT |
| Oligonucleotides (5'→3') used for site-directed mutagenesis               |         |                                                             |
| protospacer <sup>-1</sup>                                                 | N1TGG-S | TGTGAGCGGAGAAGATGGTCACACAGGAAACAGCTATGAC                    |
|                                                                           | N1TGG-A | TCCTGTGTGACCATCTTCTCCGCTCACAATTCCACACAAC                    |
|                                                                           | N1+1-S  | TGTGAGCGGAGAAGATTGGCACACAGGAAACAGCTATGAC                    |
|                                                                           | N1+1-A  | TTCTGTGTGCCAATCTTCTCCGCTCACAATTCCACACAA                     |

|               |         |                                           |
|---------------|---------|-------------------------------------------|
|               | N1+2-S  | TGTGAGCGGAGAAGATTTGGACACAGGAAACAGCTATGAC  |
|               | N1+2-A  | TTTCCTGTGTCCAAATCTTCTCCGCTCACAATTCCACACA  |
|               | N1+3-S  | TGTGAGCGGAGAAGATTTTGGCACAGGAAACAGCTATGAC  |
|               | N1+3-A  | GTTTCCTGTGCCAAAATCTTCTCCGCTCACAATTCCACAC  |
|               | N1+4-S  | TGTGAGCGGAGAAGAATTTTGGACAGGAAACAGCTATGAC  |
|               | N1+4-A  | TGTTTCCTGTCCAAAATCTTCTCCGCTCACAATTCCACA   |
| protospacer-1 | N1+5-S  | TGTGAGCGGAGAAGAATTTTTGGCAGGAAACAGCTATGAC  |
|               | N1+5-A  | CTGTTTCCTGCCAAAATCTTCTCCGCTCACAATTCCAC    |
|               | N1-1-S  | TGTGAGCGGAGAAGAGGTTTACACAGGAAACAGCTATGAC  |
|               | N1-1-A  | CCTGTGTGAACCTCTTCTCCGCTCACAATTCCACACAACA  |
|               | N1-2-S  | TGTGAGCGGAGAAAGTTTTACACAGGAAACAGCTATGAC   |
|               | N1-2-A  | CTGTGTGAAACCTTTCTCCGCTCACAATTCCACACAACAT  |
|               | N1-3-S  | TGTGAGCGGAGAAGGTTTTACACAGGAAACAGCTATGAC   |
|               | N1-3-A  | CTGTGTGAAAACCTTCTCCGCTCACAATTCCACACAACAT  |
| protospacer-2 | N2+1-S  | TTAATGCAGCTTGGACGACAGGTTTCCCGACTGGAAAGCG  |
|               | N2+1-A  | AACCTGTCGTCCAAGCTGCATTAATGAATCGGCCAACGCG  |
|               | N2+2-S  | TAATGCAGCTTTGGCGACAGGTTTCCCGACTGGAAAGCGG  |
|               | N2+2-A  | AAACCTGTCGCCAAAGCTGCATTAATGAATCGGCCAACGCG |
|               | N2+3-S  | TAATGCAGCTTTCCGGTACAGGTTTCCCGACTGGAAAGCGG |
|               | N2+3-A  | GGAAACCTGTACCGAAAGCTGCATTAATGAATCGGCCAAC  |
|               | N2+4-S  | TAATGCAGCTTTCAGGACAGGTTTCCCGACTGGAAAGCGG  |
|               | N2+4-A  | GAAACCTGTCCTGAAAGCTGCATTAATGAATCGGCCAACG  |
|               | N2+5-S  | TAATGCAGCTTTCACGGCAGGTTTCCCGACTGGAAAGCGG  |
|               | N2+5-A  | GGGAAACCTGCCGTGAAAGCTGCATTAATGAATCGGCCAA  |
|               | N2+6-S  | TAATGCAGCTTTCAGTGGAGGTTTCCCGACTGGAAAGCGG  |
|               | N2+6-A  | CGGAAACCTCCAGTAAAGCTGCATTAATGAATCGGCCA    |
|               | N2-1-S  | ATTAATGCAGCGGTCACGACAGGTT                 |
|               | N2-1-A  | AACCTGTCGTGACCGCTGCATTAAT                 |
|               | N2-2-S  | CGATTCATTAATGCAGGGTTCACGACAGGTTTCCC       |
|               | N2-2-A  | GGGAAACCTGTCGTGAACCCTGCATTAATGAATCG       |
|               | N2-3-S  | ATTAATGCAGGTTTACGACAGGTTTCCCGACTGGAAAGC   |
|               | N2-3-A  | ACCTGTCGTGAAACCTGCATTAATGAATCGGCCAACGCGC  |
|               | N2-4-S  | TCATTAATGCGGCTTTCACGACAGGTTTCCCGACTGGAAA  |
|               | N2-4-A  | ACCTGTCGTGAAAGCCGCATTAATGAATCGGCCAACGCGC  |
|               | N2-5-S  | ATTCATTAATTGGTCTTTCACGACAGGTTTCCCGACTGGA  |
|               | N2-5-A  | ACCTGTCGTGAAAGACCAATTAATGAATCGGCCAACGCGC  |
|               | N2-6-S  | TTCATTAATGGAGCTTTCACGACAGGTTTCCCGACTGGAA  |
|               | N2-6-A  | ACCTGTCGTGAAAGCTCCATTAATGAATCGGCCAACGCGC  |
|               | N2TAG-S | ATTAATGCAGCTAGCACGACAGGTT                 |
|               | N2TAG-A | AACCTGTCGTGCTAGCTGCATTAAT                 |
|               | N2TTG-S | ATTAATGCAGCTTGCACGACAGGTT                 |
|               | N2TTG-A | AACCTGTCGTGCAAGCTGCATTAAT                 |
|               | N2TCG-S | TAATGCAGCTCGCACGACAGGTTTCCCGACTGGAAAGCGG  |

|               |               |                                          |
|---------------|---------------|------------------------------------------|
|               | N2TCG-A       | CCTGTCGTGCGAGCTGCATTAATGAATCGGCCAACGCGCG |
|               | N2TGA-S       | ATTAATGCAGCTGACACGACAGGTT                |
|               | N2TGA-A       | AACCTGTCGTGTCAGCTGCATTAAT                |
|               | N2TGT-S       | ATTAATGCAGCTGTCACGACAGGTT                |
|               | N2TGT-A       | AACCTGTCGTGACAGCTGCATTAAT                |
|               | N2TGC-S       | ATTAATGCAGCTGCCACGACAGGTT                |
| protospacer-2 | N2TGC-A       | AACCTGTCGTGGCAGCTGCATTAAT                |
|               | N2TAA-S       | TAATGCAGCTAACACGACAGGTTTCCCGACTGGAAAGCGG |
|               | N2TAA-A       | ACCTGTCGTGTTAGCTGCATTAATGAATCGGCCAACGCGC |
|               | N2TAT-S       | TAATGCAGCTATCACGACAGGTTTCCCGACTGGAAAGCGG |
|               | N2TAT-A       | ACCTGTCGTGATAGCTGCATTAATGAATCGGCCAACGCGC |
|               | N2TAC-S       | TAATGCAGCTACCACGACAGGTTTCCCGACTGGAAAGCGG |
|               | N2TAC-A       | ACCTGTCGTGGTAGCTGCATTAATGAATCGGCCAACGCGC |
|               | N2TTA-S       | TAATGCAGCTTACACGACAGGTTTCCCGACTGGAAAGCGG |
|               | N2TTA-A       | ACCTGTCGTGTAAGCTGCATTAATGAATCGGCCAACGCGC |
|               | N2TTT-S       | ATTAATGCAGCTTTCACGACAGGTT                |
|               | N2TTT-A       | AACCTGTCGTGAAAGCTGCATTAAT                |
|               | N2TTC-S       | TAATGCAGCTTCCACGACAGGTTTCCCGACTGGAAAGCGG |
|               | N2TTC-A       | ACCTGTCGTGGAAGCTGCATTAATGAATCGGCCAACGCGC |
|               | N2TCA-S       | TAATGCAGCTCACACGACAGGTTTCCCGACTGGAAAGCGG |
|               | N2TCA-A       | ACCTGTCGTGTGAGCTGCATTAATGAATCGGCCAACGCGC |
|               | N2TCT-S       | TAATGCAGCTCTCACGACAGGTTTCCCGACTGGAAAGCGG |
|               | N2TCT-A       | ACCTGTCGTGAGAGCTGCATTAATGAATCGGCCAACGCGC |
|               | N2TCC-S       | ATTAATGCAGCTCCCACGACAGGTT                |
|               | N2TCC-A       | AACCTGTCGTGGGAGCTGCATTAAT                |
|               | protospacer-3 | N3TGG-S                                  |
| N3TGG-A       |               | GAGCCGGAAGACCAAAGTGTAAGCCTGGGGTGCCTAATG  |
| N3+1-S        |               | TTTACACTTTTGGCTTCCGGCTCGTATGTTGTGTGGAATT |
| N3+1-A        |               | AGCCGGAAGCCAAAAGTGTAAGCCTGGGGTGCCTAATGA  |
| N3+2-S        |               | TTTACACTTTTTGGTTCCGGCTCGTATGTTGTGTGGAATT |
| N3+2-A        |               | CGAGCCGGAACCAAAAAGTGTAAGCCTGGGGTGCCTAAT  |
| N3+3-S        |               | TTTACACTTTCCTGGTCCGGCTCGTATGTTGTGTGGAATT |
| N3+3-A        |               | ACGAGCCGGACCAGGAAAGTGTAAGCCTGGGGTGCCTAA  |
| N3+4-S        |               | TTTACACTTTCCGCGGCCGGCTCGTATGTTGTGTGGAATT |
| N3+4-A        |               | TACGAGCCGGCCGCGGAAAGTGTAAGCCTGGGGTGCCTA  |
| N3+5-S        |               | TTTACACTTTCCGCTGGCGGCTCGTATGTTGTGTGGAATT |
| N3+5-A        |               | ATACGAGCCGCCAGCGGAAAGTGTAAGCCTGGGGTGCCT  |
| N3+6-S        |               | TTTACACTTTCCGCTTGGGGCTCGTATGTTGTGTGGAATT |
| N3+6-A        |               | CATACGAGCCCAAGCGGAAAGTGTAAGCCTGGGGTGCC   |
| N3-1-S        |               | CTTTACACTTGGTGCTTCCGGCTCGTATGTTGTGTGGAAT |
| N3-1-A        |               | GCCGGAAGCACCAAGTGTAAGCCTGGGGTGCCTAATGAG  |
| N3-2-S        |               | GCTTTACACTGGTTGCTTCCGGCTCGTATGTTGTGTGGAA |
| N3-2-A        |               | GCCGGAAGCAACCAGTGTAAGCCTGGGGTGCCTAATGAG  |

|                                                             |                             |                                           |
|-------------------------------------------------------------|-----------------------------|-------------------------------------------|
|                                                             | N3-3-S                      | GGCTTTACACGGTTTGCTTCCGGCTCGTATGTTGTGTGGA  |
|                                                             | N3-3-A                      | GCCGGAAGCAAACCGTGTAAGCCTGGGGTGCCTAATGAG   |
|                                                             | N3-4-S                      | AGGCTTTACAGGTTTTGCTTCCGGCTCGTATGTTGTGTGG  |
|                                                             | N3-4-A                      | GCCGGAAGCAAACCGTGTAAGCCTGGGGTGCCTAATGAG   |
|                                                             | N3-5-S                      | CAGGCTTTACGGTTTTTGCTTCCGGCTCGTATGTTGTGTG  |
|                                                             | N3-5-A                      | GCCGGAAGCAAAAACCGTGTAAGCCTGGGGTGCCTAATGAG |
| protospacer-3                                               | N3-6-S                      | CCAGGCTTTAGGCTTTTTGCTTCCGGCTCGTATGTTGTGT  |
|                                                             | N3-6-A                      | GCCGGAAGCAAAAAGCCTAAGCCTGGGGTGCCTAATGAG   |
| Oligonucleotides (5' → 3') used as PAMmers at protospacer-2 |                             |                                           |
| N2PL                                                        | TGGCACGACAGGTTTCCCG         |                                           |
| N2PTTC                                                      | TTCCACGACAGGTTTCCCG         |                                           |
| N2PM                                                        | AATGCAGCTGGCACGACAG         |                                           |
| N2PR                                                        | GATTCATTAATGCAGCTGG         |                                           |
| N2PE                                                        | AATGCAGCTGGCACGACAGGTTTCCCG |                                           |
| N2PA                                                        | CGGGAAACCTGTCGTGGGA         |                                           |
